# Supplementary material for: Bimetallic Schiff-base aluminum complexes based on pentaerythrityl tetramine and their stereoselective polymerization of racemic lactide
Source: Royal Society of Chemistry journal article supplement (doi:10.1039/c4ra02092h), 2014-01-01
Supplement: c4ra02092h1.pdf [file c4ra02092h1.pdf]

## Supporting information

### Bimetallic Schiff-base Aluminum Complex Based on Pentaerythrityl Tetramine and Their Stereoselective Polymerization of Racemic Lactide

Xuan Pang, Ranlong Duan, Xiang Li, Bo Gao, Zhiqiang Sun, Xianhong Wang, Xuesi Chen

Key Laboratory of Polymer Ecomaterials, Changchun Institute of Applied Chemistry, Chinese Academy of Sciences, Changchun 130022, China

Correspondence to: Xuesi Chen (E-mail: xschen@ciac.ac.cn)

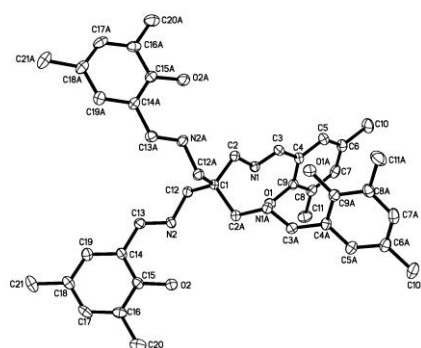

**Figure S1** Crystal structure of **ligand 2**. CCDC 908777

**Table S1.** Summary of crystallographic data for **ligand 2**.

| <b>Ligand 2</b>                                     |                                                               |
|-----------------------------------------------------|---------------------------------------------------------------|
| Formula                                             | C <sub>41</sub> H <sub>48</sub> N <sub>4</sub> O <sub>4</sub> |
| <i>F</i> <sub>w</sub>                               | 660.83                                                        |
| crystal system                                      | Monoclinic                                                    |
| space group                                         | C2/c                                                          |
| <i>a</i> (Å)                                        | 19.779(2)                                                     |
| <i>b</i> (Å)                                        | 9.9011(13)                                                    |
| <i>c</i> (Å)                                        | 18.960(2)                                                     |
| <i>α</i> (deg)                                      | 90.00                                                         |
| <i>β</i> (deg)                                      | 102.300(2)                                                    |
| <i>γ</i> (deg)                                      | 90.00                                                         |
| <i>v</i> (Å <sup>3</sup> )                          | 3627.8(8)                                                     |
| <i>Z</i>                                            | 4                                                             |
| <i>μ</i> (mm <sup>-1</sup> )                        | 0.078                                                         |
| <i>R</i> (int)                                      | 0.0702                                                        |
| GOOF                                                | 0.954                                                         |
| <i>R</i> <sub>1</sub> [ <i>I</i> > 2σ( <i>I</i> )]  | 0.0573                                                        |
| <i>wR</i> <sub>2</sub> [ <i>I</i> > 2σ( <i>I</i> )] | 0.1474                                                        |

### Calculation of the entropy and enthalpy difference between homo-propagation and cross-propagation

In a first-order Markovian statistics, PLA derived from *rac*-lactide could exhibit up to five tetrad sequences (mmm, mmr, rmm, mrm, rmr) in relative ratios determined by the ability of initiators to control racemic [r-diad] and meso [m-diad] connectivity of the monomer units. According to first-order Markovian statistics, the probability for *meso* linkages could be determined as

$$P_m = k_m/(k_m + k_r) = k_{S/SS}/(k_{S/SS} + k_{S/RR}) = k_{R/RR}/(k_{R/SS} + k_{R/RR}) \quad (S1)$$

where  $k_{S/SS}$  and  $k_{R/RR}$  were the rate constants of homopropagation,  $k_{S/RR}$  and  $k_{R/SS}$  were the rate constants of cross propagation. If  $k_{S/SS} > k_{S/RR}$  or  $k_{R/RR} > k_{R/SS}$ , the formation of isotactic sequences were favored, otherwise syndiotactic sequences were formed. The following equations could be deduced according to absolute reaction rate theory:

$$k_{S/SS} = k_{R/RR} = k_m = (KT/h)\exp[(\Delta S_m^\ddagger/R) - (\Delta H_m^\ddagger/RT)] \quad (S2)$$

$$k_{R/SS} = k_{S/RR} = k_r = (KT/h)\exp[(\Delta S_r^\ddagger/R) - (\Delta H_r^\ddagger/RT)] \quad (S3)$$

Further deduction of equation S4 could be obtained from equation S2 and equation S3:

$$P_m/(1 - P_m) = k_m/k_r = \exp[(\Delta S_m^\ddagger - \Delta S_r^\ddagger)/R - (\Delta H_m^\ddagger - \Delta H_r^\ddagger)/RT] \quad (S4)$$

where  $(\Delta S_m^\ddagger - \Delta S_r^\ddagger)$  was the entropy difference between homopropagation and cross propagation, and  $(\Delta H_m^\ddagger - \Delta H_r^\ddagger)$  was the enthalpy difference between homopropagation and cross propagation. To determine the values of  $(\Delta S_m^\ddagger - \Delta S_r^\ddagger)$  and  $(\Delta H_m^\ddagger - \Delta H_r^\ddagger)$ ,  $\ln P_m/(1 - P_m)$  was plotted versus the  $1/T$  (Figure S2). From this plot, the entropy difference  $(\Delta S_m^\ddagger - \Delta S_r^\ddagger)$  of  $-23.23$  cal/K·mol and activation enthalpy difference  $(\Delta H_m^\ddagger - \Delta H_r^\ddagger)$  of  $-9.42$  kcal/K·mol were obtained, which may explain the preference of isotactic stereosequence.

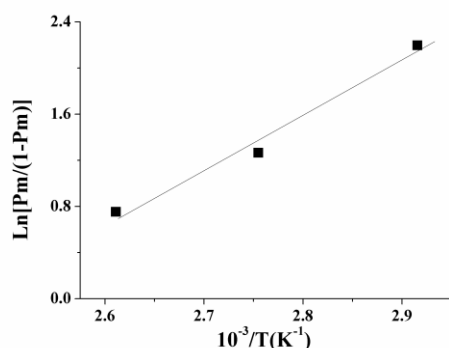

**Figure S2** Relationship between polymerization temperature and stereochemistry of the resulting poly(*rac*-LA)s by using **3a**.
